# Supplementary material
Source: Royal Society of Chemistry journal article supplement (doi:10.1039/d6gc00912c)
Supplement: d6gc00912c1.pdf [file d6gc00912c1.pdf]

## Supplementary Information

### **Life Cycle Assessment of a Layered Metal-Organic Framework for Supercapacitor Applications**

Chloe J. Balhatchet<sup>1</sup>, Alexander C. Forse<sup>1</sup>, Taylor Uekert<sup>1\*</sup>

<sup>1</sup> Yusuf Hamied Department of Chemistry, University of Cambridge, Lensfield Road, Cambridge CB2 1EW, UK.

\* Contact: [tmu22@cam.ac.uk](mailto:tmu22@cam.ac.uk)

# Table of Contents

|                                                                           |           |
|---------------------------------------------------------------------------|-----------|
| <b>Introduction to MOFs</b> .....                                         | <b>1</b>  |
| Figure S1 .....                                                           | 1         |
| Table S1 .....                                                            | 1         |
| <b>Introduction to LCA Methods</b> .....                                  | <b>2</b>  |
| <b>Life Cycle Inventories</b> .....                                       | <b>2</b>  |
| <b>Background Data</b> .....                                              | <b>2</b>  |
| <b>Benchmark Life Cycle Inventory of Activated Carbon</b> .....           | <b>2</b>  |
| Table S2 .....                                                            | 3         |
| <b>Life Cycle Inventory for Cu<sub>3</sub>(HHTP)<sub>2</sub></b> .....    | <b>3</b>  |
| Table S3 .....                                                            | 3         |
| Table S4 .....                                                            | 4         |
| <b>Life Cycle Inventory for Assembled Commercial Supercapacitor</b> ..... | <b>4</b>  |
| Table S5 .....                                                            | 4         |
| Table S6 .....                                                            | 4         |
| Table S7 .....                                                            | 5         |
| Table S8 .....                                                            | 5         |
| Table S9 .....                                                            | 5         |
| <b>Life Cycle Assessment Results</b> .....                                | <b>6</b>  |
| <b>For Full Supercapacitor</b> .....                                      | <b>6</b>  |
| Table S10 .....                                                           | 6         |
| Table S11 .....                                                           | 7         |
| Table S12 .....                                                           | 8         |
| Table S13 .....                                                           | 9         |
| <b>For Cu<sub>3</sub>(HHTP)<sub>2</sub></b> .....                         | <b>9</b>  |
| Figure S2 .....                                                           | 9         |
| Figure S3 .....                                                           | 10        |
| Figure S4 .....                                                           | 11        |
| Figure S5 .....                                                           | 12        |
| Figure S6 .....                                                           | 13        |
| <b>References</b> .....                                                   | <b>14</b> |

## Introduction to MOFs

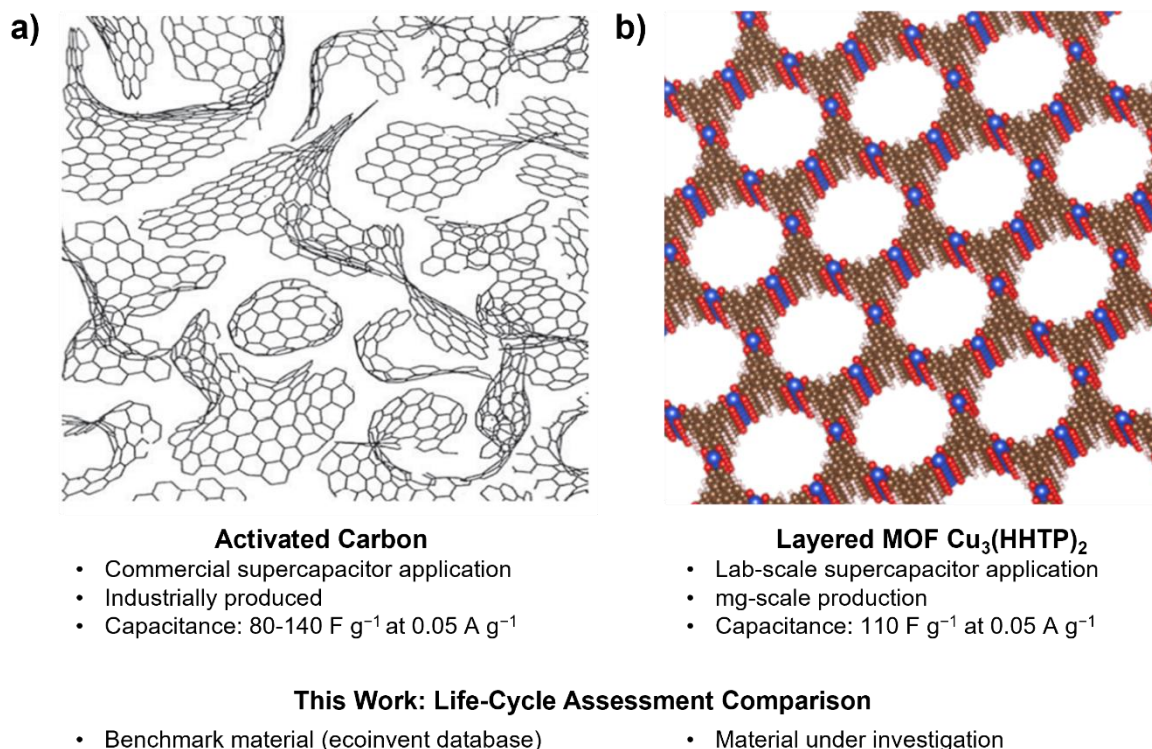

**Figure S1:** **a)** Schematic of activated carbon, conventionally used in commercial supercapacitors, which has a disordered amorphous structure. Figure from Harris.<sup>1</sup> Capacitance range for activated carbon from a number of sources, taken from Sheberla *et al.*<sup>2</sup> **b)** Layered MOFs have an ordered crystalline structure, with a well-defined pore size, example shown is Cu<sub>3</sub>(HHTP)<sub>2</sub>, HHTP = 2,3,6,7,10,11-hexahydroxytriphenylene. Computer structure shared by Matthias Goulomb. Capacitance taken from Gittins *et al.*<sup>3</sup>

| Topic                                                  | Number of Papers | % of total  |
|--------------------------------------------------------|------------------|-------------|
| <b>“Supercap”</b><br>+ “Life Cycle Assessment”         | >98,000<br>62    | -<br>0.0006 |
| <b>“MOF”</b><br>+ “Life Cycle Assessment”              | >136,000<br>37   | -<br>0.0003 |
| <b>“Supercap” + “MOF”</b><br>+ “Life Cycle Assessment” | >3,400<br>0      | -<br>0      |

**Table S1:** Number of mentions of “Life Cycle Assessment” in supercapacitor and MOF papers compared to total papers. From *webofknowledge database*. Accessed 30/01/2025.

## Introduction to LCA Methods

ReCiPe 2016 is a state-of-the-art life cycle assessment (LCA) method which calculates 18 midpoint impact categories, such as global warming potential.<sup>4</sup> In this methodology, midpoint impacts can be combined into three endpoint impact categories: (i) the natural environment via time-integrated species loss resulting in damage to ecosystem quality; (ii) resource scarcity through surplus cost due to damage to resource availability; and (iii) human health through disability-adjusted loss of life years.

Using ReCiPe 2016, impacts can be considered with three different perspectives: 20-year (Individualist), 100-year (Hierarchist) or 1000-year-infinite (Egalitarian) timescales. Additional assumptions are associated with each of these methodologies.<sup>5</sup> The Individualist perspective (ReCiPe 2016 I) is based on short-term interests, including only undisputed impacts, and has an optimistic perspective with respect to human technological adaptation to impacts. The Hierarchist perspective (ReCiPe 2016 H) is based on scientific consensus, in terms of both impact timeframe and potential impact mechanisms. Finally, the Egalitarian perspective (ReCiPe 2016 E) is the most precautionary approach which considers all possible impact pathways and the longest possible time frame. This work follows the best scientific consensus using the Hierarchist approach, ReCiPe 2016 H.

Due to the approximations involved with data in the life cycle inventory, there is inherent uncertainty in the LCA results. Monte Carlo analysis is a commonly used method to quantitatively assess this by running repeated assessments using random input values within a specified probable range.<sup>6</sup> From the variation in output data, the effect of uncertainty in the input data on the output results can be measured, and a quantifiable uncertainty in the impact measurements produced.

## Life Cycle Inventories

### Background Data

All LCAs were conducted in OpenLCA using the ecoinvent database version 3.8.

### Benchmark Life Cycle Inventory of Activated Carbon

Data were normalised relative to the LCA impacts of 1.7 g of activated carbon in the database using ReCiPe Midpoint (H) and ReCiPe Endpoint (H) as the impact assessment methods (**Table S2**).<sup>4</sup> Whilst the scale of the LCA considers one 1 x 5 F commercial supercapacitor, 10 wt.% of both carbon and MOF electrodes is made up of carbon black, and 5 wt.% PTFE so both of these contributions can be excluded here.<sup>7</sup> Hence, 1.7 g total is considered for all our active materials. As the ecoinvent database only has one type of activated carbon, this is assumed to be representative for supercapacitor electrode application. However, it has been

shown that activated carbon from different sources can be associated with impacts of varying magnitude, with theecoinvent coal-derived activated carbon compared to coconut-derived activated carbon by Glogic *et al.*; differences on average tend to average out when comparing between different impact categories.<sup>7</sup>

| Designation | Item                       | Amount | Unit |
|-------------|----------------------------|--------|------|
| consumable  | activated carbon, granular | 1.7    | g    |

**Table S2:** LCA inventory for 1.7 g of activated carbon, the output of which was used for normalisation of other impacts relative to carbon.

### Life Cycle Inventory for $\text{Cu}_3(\text{HHTTP})_2$

The life cycle inventory for the laboratory-scale synthesis of 1.7 g of copper(II) 2,3,6,7,10,11-hexahydroxytriphenylene,  $\text{Cu}_3(\text{HHTTP})_2$ , is given in **Table S3**, based on a literature synthesis from Gittins *et al.*<sup>8</sup> The data were used to produce the LCA with ReCiPe Midpoint (H) and ReCiPe Endpoint (H) as the impact assessment methods.<sup>4</sup> Further, a Monte Carlo analysis of 1000 iterations was used to conduct the uncertainty analysis. For this, the standard deviation of the experimental yield recorded in-house was used ( $\pm 6\%$ ). Electricity calculations were based on the energy consumption ratings of lab equipment. In scaling the MOF synthesis reagents from the mg scale to achieve the required 1.7 g of active electrode material, the energy inputs were not scaled, as the same size of equipment was assumed to be applicable. The life cycle inventory for starting material 2,3,6,7,10,11-hexahydroxytriphenylene hydrate ( $\text{H}_6\text{HHTTP}\cdot x\text{H}_2\text{O}$ ), with one-step linker synthesis from Morimoto *et al.*, is also given in **Table S4**, where the literature synthesis was already of a suitable scale.<sup>9</sup> Other approximations based on data availability are given below.

| Designation  | Item                                                                | Amount | Unit |
|--------------|---------------------------------------------------------------------|--------|------|
| consumable   | acetone                                                             | 1.7    | kg   |
| consumable   | ammonia, anhydrous, liquid (approx. for 35% $\text{NH}_3$ solution) | 11     | g    |
| consumable   | copper-rich materials (approx. for $\text{CuNO}_3$ )                | 1.9    | g    |
| utility      | electricity, medium voltage                                         | 350    | kWh  |
|              | ethanol, without water, in 99.7% solution state, from               |        |      |
| consumable   | fermentation                                                        | 1.1    | kg   |
| consumable   | $\text{H}_6\text{HHTTP}$ linker*                                    | 1.6    | g    |
| consumable   | water, deionised                                                    | 1.5    | kg   |
| waste output | spent solvent mixture                                               | 5.1    | kg   |
| output       | $\text{Cu}_3(\text{HHTTP})_2$                                       | 1.7    | g    |

**Table S3:** LCA inventory for 1.7 g of  $\text{Cu}_3(\text{HHTTP})_2$  based Gittins *et al.*<sup>10</sup> \*The  $\text{H}_6\text{HHTTP}$  linker LCA inventory is in table **Table S4**. Substitutions are given in parentheses. Amounts are given to two significant figures.

Approximations due to lacking data entry:

- 35% ammonia solution approximated as ammonia
- Copper nitrate approximated by copper-rich materials

| Designation  | Item                                                    | Amount | Unit |
|--------------|---------------------------------------------------------|--------|------|
| consumable   | hexafluoroethane (approx. for hexafluoroisopropanol)    | 420    | g    |
| consumable   | phenyl acetic acid (approx. for (diacetoxyiodo)benzene) | 33     | g    |
| consumable   | o-aminophenol (approx. for catechol)                    | 3.6    | g    |
| consumable   | methane sulfonic acid                                   | 3.1    | g    |
| consumable   | dichloromethane                                         | 210    | g    |
| consumable   | sodium hydrogen sulfite                                 | 0.5    | g    |
| utility      | electricity, medium voltage                             | 2.1    | kWh  |
| waste output | spent solvent mixture                                   | 423    | g    |
| output       | H <sub>6</sub> HHTP                                     | 1.6    | g    |

**Table S4:** LCA inventory for 1.6 g of the H<sub>6</sub>HHTP linker, based on the synthesis from Morimoto *et al.*<sup>9</sup> Amounts are given to two significant figures.

Approximations due to lacking data entry:

- Hexafluoroisopropane approximated as hexafluoroethane
- (diacetoxyiodo)benzene approximated as phenyl acetic acid
- Catechol approximated as o-aminophenol

Approximations due to unknown quantities:

- Sodium hydrosulfite quantity approximated as 0.1 g per synthesis
- Solvent evaporation assumed to be on a rotary evaporator for six minutes
- Dichloromethane washing volume estimated as 100 mL per gram of product

### Life Cycle Inventory for Assembled Commercial Supercapacitor

To validate the methodology of comparing the active electrode material of MOF and carbon electrodes, a full LCA of a commercial supercapacitor (based on those used by Cossutta *et al.*) employing MOF electrodes was compared to that with standard activated carbon electrodes.<sup>11</sup> Their respective life cycle inventories are given in **Table S5** and **Table S6**. **Table S7** and **Table S8** are the life cycle inventories for their constituent electrodes, following the procedure for composite MOF films published by Gittins *et al.*<sup>10</sup> **Table S9** gives the life cycle inventory for the organic electrolyte.

| Designation | Item                                         | Amount | Unit |
|-------------|----------------------------------------------|--------|------|
| consumable  | MOF electrode*                               | 2.0    | g    |
| consumable  | synthetic rubber                             | 0.57   | g    |
|             | metal working, average for aluminium product |        |      |
| consumable  | manufacturing                                | 2.9    | g    |
| consumable  | organic electrolyte**                        | 1.6    | g    |
| consumable  | battery separator                            | 0.28   | g    |
| utility     | electricity, medium voltage                  | 0.41   | MJ   |

**Table S5:** LCA inventory for a two-electrode commercial supercapacitor based on the inventory used by Cossutta *et al.*, with Cu<sub>3</sub>(HHTP)<sub>2</sub>-composite film electrodes of 1.0 g each.<sup>11</sup> \*LCA inventory for MOF film is in **Table S8**. \*\*LCA inventory for organic electrolyte is in **Table S9**. Amounts are given to two significant figures.

| Designation | Item                                         | Amount | Unit |
|-------------|----------------------------------------------|--------|------|
| consumable  | Carbon electrode*                            | 2.0    | g    |
| consumable  | synthetic rubber                             | 0.57   | g    |
| consumable  | metal working, average for aluminium product |        |      |
| consumable  | manufacturing                                | 2.9    | g    |
| consumable  | organic electrolyte**                        | 1.6    | g    |
| consumable  | battery separator                            | 0.28   | g    |
| utility     | electricity, medium voltage                  | 0.41   | MJ   |

**Table S6:** LCA inventory for a two-electrode commercial supercapacitor based on the inventory used by Cossutta *et al.*, with activated carbon (ecoinvent) film electrodes of 1.0 g each.<sup>11</sup> \*LCA inventory for carbon film is in **Table S8**. \*\*LCA inventory for organic electrolyte is in **Table S9**. Amounts are given to two significant figures.

| Designation | Item                                                               | Amount | Unit |
|-------------|--------------------------------------------------------------------|--------|------|
| consumable  | Cu <sub>3</sub> (HHTP) <sub>2</sub> *                              | 1.7    | g    |
| consumable  | polyvinylfluoride, dispersion (approx. for PTFE binder)            | 0.1    | g    |
| consumable  | carbon black                                                       | 0.2    | g    |
| consumable  | ethanol, without water, in 99.7% solution state, from fermentation | 47     | g    |
| utility     | electricity, medium voltage                                        | 240    | kWh  |
| output      | MOF electrode                                                      | 2.0    | g    |

**Table S7:** LCA inventory for 85 wt.% Cu<sub>3</sub>(HHTP)<sub>2</sub>-composite film of total 2.0 g. \*LCA inventory for Cu<sub>3</sub>(HHTP)<sub>2</sub> is in **Table S3**. Substitutions are given in parentheses. Amounts are given to two significant figures where possible.

| Designation | Item                                                               | Amount | Unit |
|-------------|--------------------------------------------------------------------|--------|------|
| consumable  | activated carbon, granular                                         | 1.7    | g    |
| consumable  | polyvinylfluoride, dispersion (approx. for PTFE binder)            | 0.1    | g    |
| consumable  | carbon black                                                       | 0.2    | g    |
| consumable  | ethanol, without water, in 99.7% solution state, from fermentation | 47     | g    |
| utility     | electricity, medium voltage                                        | 240    | kWh  |
| output      | Carbon electrode                                                   | 2.0    | g    |

**Table S8:** LCA inventory for 85 wt.% activated carbon-composite film of total 2.0 g. Substitutions are given in parentheses. Amounts are given to two significant figures where possible.

| Designation | Item                                                                        | Amount | Unit |
|-------------|-----------------------------------------------------------------------------|--------|------|
| consumable  | sodium tetrafluoroborate (approx. for tetraethylammonium tetrafluoroborate) | 0.39   | g    |
| consumable  | acetonitrile                                                                | 1.2    | g    |
| output      | Organic electrolyte                                                         | 1.6    | g    |

**Table S9:** LCA inventory for 1.6 g of organic electrolyte, 1M tetraethylammonium tetrafluoroborate (NEt<sub>4</sub>BF<sub>4</sub>) in acetonitrile. Substitutions are given in parentheses. Amounts are given to two significant figures.

## Life Cycle Assessment Results

|                                         | Unit         | Activated Carbon Benchmark<br>Supercapacitor Production |                  |              |
|-----------------------------------------|--------------|---------------------------------------------------------|------------------|--------------|
|                                         |              | Impact                                                  | Electrode /<br>% | Other /<br>% |
| Fine particulate matter formation       | kg PM2.5 eq  | 0.000246                                                | 89.1             | 10.9         |
| Fossil resource scarcity                | kg oil eq    | 0.0122                                                  | 65.7             | 34.3         |
| Freshwater ecotoxicity                  | kg 1,4-DCB   | 0.00266                                                 | 33.7             | 66.3         |
| Freshwater eutrophication               | kg P eq      | 0.0000175                                               | 73.0             | 27.0         |
| Global warming                          | kg CO2 eq    | 0.0347                                                  | 56.8             | 43.2         |
| Human carcinogenic toxicity             | kg 1,4-DCB   | 0.00333                                                 | 44.9             | 55.1         |
| Human non-carcinogenic toxicity         | kg 1,4-DCB   | 0.0627                                                  | 70.9             | 29.1         |
| Ionizing radiation                      | kBq Co-60 eq | 0.00184                                                 | 60.4             | 39.6         |
| Land use                                | m2a crop eq  | 0.0652                                                  | 99.7             | 0.3          |
| Marine ecotoxicity                      | kg 1,4-DCB   | 0.00344                                                 | 35.9             | 64.1         |
| Marine eutrophication                   | kg N eq      | 0.000111                                                | 99.3             | 0.7          |
| Mineral resource scarcity               | kg Cu eq     | 0.000194                                                | 44.0             | 56.0         |
| Ozone formation, Human health           | kg NOx eq    | 0.000243                                                | 86.0             | 14.0         |
| Ozone formation, Terrestrial ecosystems | kg NOx eq    | 0.000260                                                | 86.6             | 13.4         |
| Stratospheric ozone depletion           | kg CFC11 eq  | 0.000000419                                             | 98.9             | 1.1          |
| Terrestrial acidification               | kg SO2 eq    | 0.000795                                                | 92.8             | 7.2          |
| Terrestrial ecotoxicity                 | kg 1,4-DCB   | 0.148                                                   | 72.5             | 27.5         |
| Water consumption                       | m3           | 0.00113                                                 | 89.6             | 10.4         |

**Table S10:** Midpoint impact contributions of activated carbon electrode benchmark to supercapacitor.

|                                         |                 | <b>Cu<sub>3</sub>(HHTP)<sub>2</sub> MOF<br/>Supercapacitor Production</b> |               |           |
|-----------------------------------------|-----------------|---------------------------------------------------------------------------|---------------|-----------|
|                                         | Unit            | Impact                                                                    | Electrode / % | Other / % |
| Fine particulate matter formation       | kg PM2.5 eq     | 0.0228                                                                    | 99.9          | 0.1       |
| Fossil resource scarcity                | kg oil eq       | 3.67                                                                      | 99.9          | 0.1       |
| Freshwater ecotoxicity                  | kg 1,4-DCB      | 0.597                                                                     | 99.7          | 0.3       |
| Freshwater eutrophication               | kg P eq         | 0.00445                                                                   | 99.9          | 0.1       |
| Global warming                          | kg CO2 eq       | 19.1                                                                      | 99.9          | 0.1       |
| Human carcinogenic toxicity             | kg 1,4-DCB      | 0.543                                                                     | 99.7          | 0.3       |
| Human non-carcinogenic toxicity         | kg 1,4-DCB      | 12.8                                                                      | 99.9          | 0.1       |
| Ionizing radiation                      | kBq Co-60<br>eq | 0.645                                                                     | 99.9          | 0.1       |
| Land use                                | m2a crop eq     | 1.65                                                                      | 100           | 0.0       |
| Marine ecotoxicity                      | kg 1,4-DCB      | 0.784                                                                     | 99.7          | 0.3       |
| Marine eutrophication                   | kg N eq         | 0.00356                                                                   | 100           | 0.0       |
| Mineral resource scarcity               | kg Cu eq        | 0.0430                                                                    | 99.7          | 0.3       |
| Ozone formation, Human health           | kg NOx eq       | 0.0297                                                                    | 99.9          | 0.1       |
| Ozone formation, Terrestrial ecosystems | kg NOx eq       | 0.0317                                                                    | 99.9          | 0.1       |
| Stratospheric ozone depletion           | kg CFC11 eq     | 0.0000294                                                                 | 100           | 0.0       |
| Terrestrial acidification               | kg SO2 eq       | 0.0574                                                                    | 99.9          | 0.1       |
| Terrestrial ecotoxicity                 | kg 1,4-DCB      | 58.8                                                                      | 99.9          | 0.1       |
| Water consumption                       | m3              | 0.179                                                                     | 99.9          | 0.1       |

**Table S11:** Midpoint impact contributions of Cu<sub>3</sub>(HHTP)<sub>2</sub> MOF electrode to MOF supercapacitor.

|                                         | Unit         | Activated Carbon Benchmark Electrode Production |           |
|-----------------------------------------|--------------|-------------------------------------------------|-----------|
|                                         |              | Carbon / %                                      | Other / % |
| Fine particulate matter formation       | kg PM2.5 eq  | 10.8                                            | 89.2      |
| Fossil resource scarcity                | kg oil eq    | 49.6                                            | 50.4      |
| Freshwater ecotoxicity                  | kg 1,4-DCB   | 34.7                                            | 65.3      |
| Freshwater eutrophication               | kg P eq      | 61.9                                            | 38.1      |
| Global warming                          | kg CO2 eq    | 68.1                                            | 31.9      |
| Human carcinogenic toxicity             | kg 1,4-DCB   | 40.3                                            | 59.7      |
| Human non-carcinogenic toxicity         | kg 1,4-DCB   | 37.4                                            | 62.6      |
| Ionizing radiation                      | kBq Co-60 eq | 66.4                                            | 33.6      |
| Land use                                | m2a crop eq  | 0.1                                             | 99.9      |
| Marine ecotoxicity                      | kg 1,4-DCB   | 34.8                                            | 65.2      |
| Marine eutrophication                   | kg N eq      | 0.5                                             | 99.5      |
| Mineral resource scarcity               | kg Cu eq     | 6.5                                             | 93.5      |
| Ozone formation, Human health           | kg NOx eq    | 16.3                                            | 83.7      |
| Ozone formation, Terrestrial ecosystems | kg NOx eq    | 15.2                                            | 84.8      |
| Stratospheric ozone depletion           | kg CFC11 eq  | 0.7                                             | 99.3      |
| Terrestrial acidification               | kg SO2 eq    | 9.6                                             | 90.4      |
| Terrestrial ecotoxicity                 | kg 1,4-DCB   | 7.8                                             | 92.2      |
| Water consumption                       | m3           | 3.3                                             | 96.7      |

**Table S12:** Midpoint impact contributions of activated carbon to benchmark electrode.

|                                         | Unit         | Cu <sub>3</sub> (HHTP) <sub>2</sub> MOF Electrode Production |           |
|-----------------------------------------|--------------|--------------------------------------------------------------|-----------|
|                                         |              | MOF / %                                                      | Other / % |
| Fine particulate matter formation       | kg PM2.5 eq  | 99.1                                                         | 0.9       |
| Fossil resource scarcity                | kg oil eq    | 99.9                                                         | 0.1       |
| Freshwater ecotoxicity                  | kg 1,4-DCB   | 99.9                                                         | 0.1       |
| Freshwater eutrophication               | kg P eq      | 99.9                                                         | 0.1       |
| Global warming                          | kg CO2 eq    | 100                                                          | 0         |
| Human carcinogenic toxicity             | kg 1,4-DCB   | 99.8                                                         | 0.2       |
| Human non-carcinogenic toxicity         | kg 1,4-DCB   | 99.8                                                         | 0.2       |
| Ionizing radiation                      | kBq Co-60 eq | 99.9                                                         | 0.1       |
| Land use                                | m2a crop eq  | 96.1                                                         | 3.9       |
| Marine ecotoxicity                      | kg 1,4-DCB   | 99.9                                                         | 0.1       |
| Marine eutrophication                   | kg N eq      | 96.9                                                         | 3.1       |
| Mineral resource scarcity               | kg Cu eq     | 99.8                                                         | 0.2       |
| Ozone formation, Human health           | kg NOx eq    | 99.4                                                         | 0.6       |
| Ozone formation, Terrestrial ecosystems | kg NOx eq    | 99.4                                                         | 0.6       |
| Stratospheric ozone depletion           | kg CFC11 eq  | 98.6                                                         | 1.4       |
| Terrestrial acidification               | kg SO2 eq    | 98.8                                                         | 1.2       |
| Terrestrial ecotoxicity                 | kg 1,4-DCB   | 99.8                                                         | 0.2       |
| Water consumption                       | m3           | 99.5                                                         | 0.5       |

**Table S13:** Midpoint impact contributions of Cu<sub>3</sub>(HHTP)<sub>2</sub> MOF to MOF electrode.

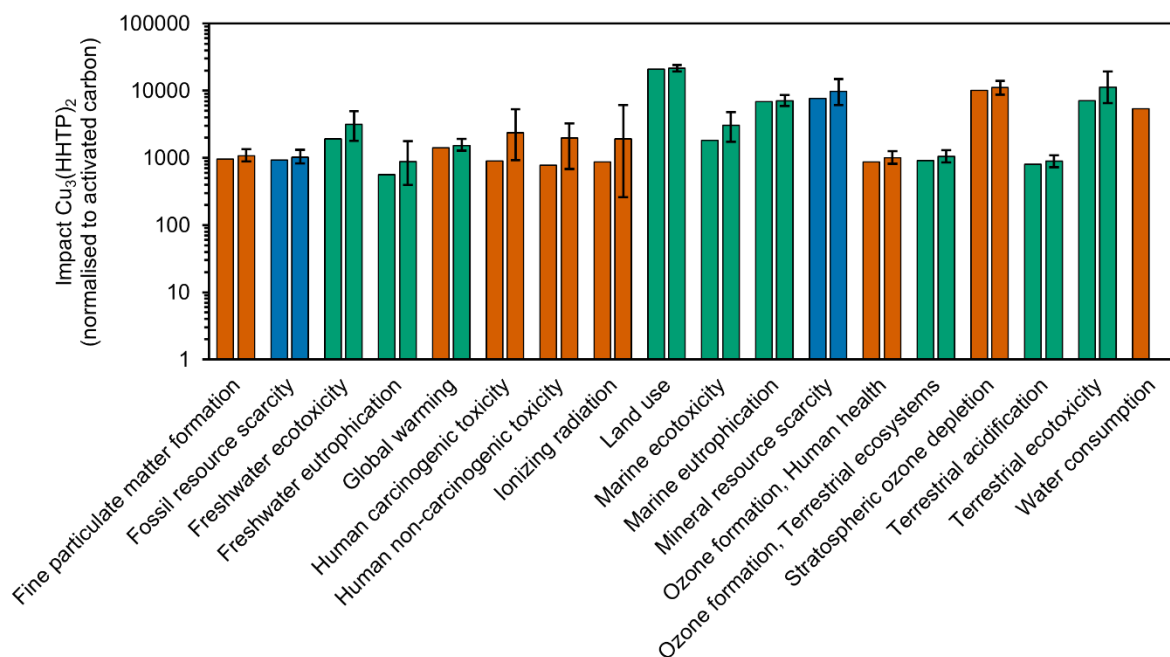

**Figure S2:** Life cycle assessment impacts of  $\text{Cu}_3(\text{HHTP})_2$ , normalised relative to benchmark carbon system. A logarithmic scale is used to represent the scale of the impact, which is between 1000 times and 100,000 times that of carbon. The first bar for each impact category was determined by ReCiPe Midpoint (H) LCA, whilst the second bar is the average determined from a Monte-Carlo uncertainty analysis with error bars representing a 95% confidence interval (the methodology for water depletion gave an erroneous negative value through Monte-Carlo analysis due to systematic error in the software so is omitted).<sup>4</sup> Blue is indicative of resource impacts, green of environmental impacts and red health impacts.

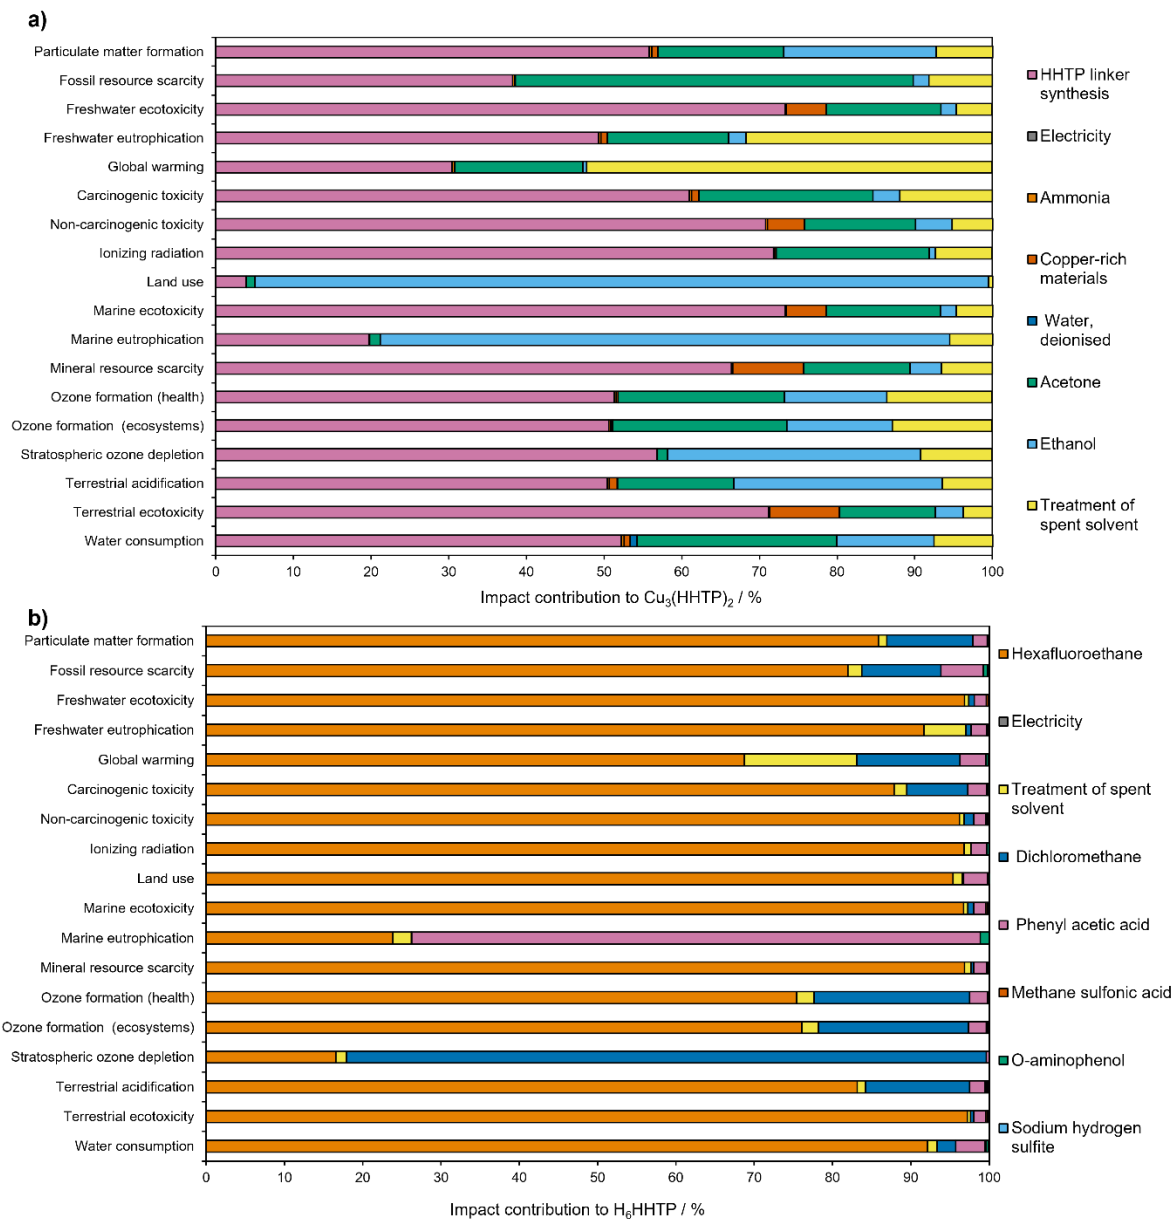

**Figure S3: a)** Hotspot analysis of midpoint impact contributions of the in-house  $\text{Cu}_3(\text{HHTP})_2$  MOF synthesis, and **b)** corresponding breakdown of impact contributions for the HHTP linker starting material LCA based on a literature synthesis.<sup>12</sup>

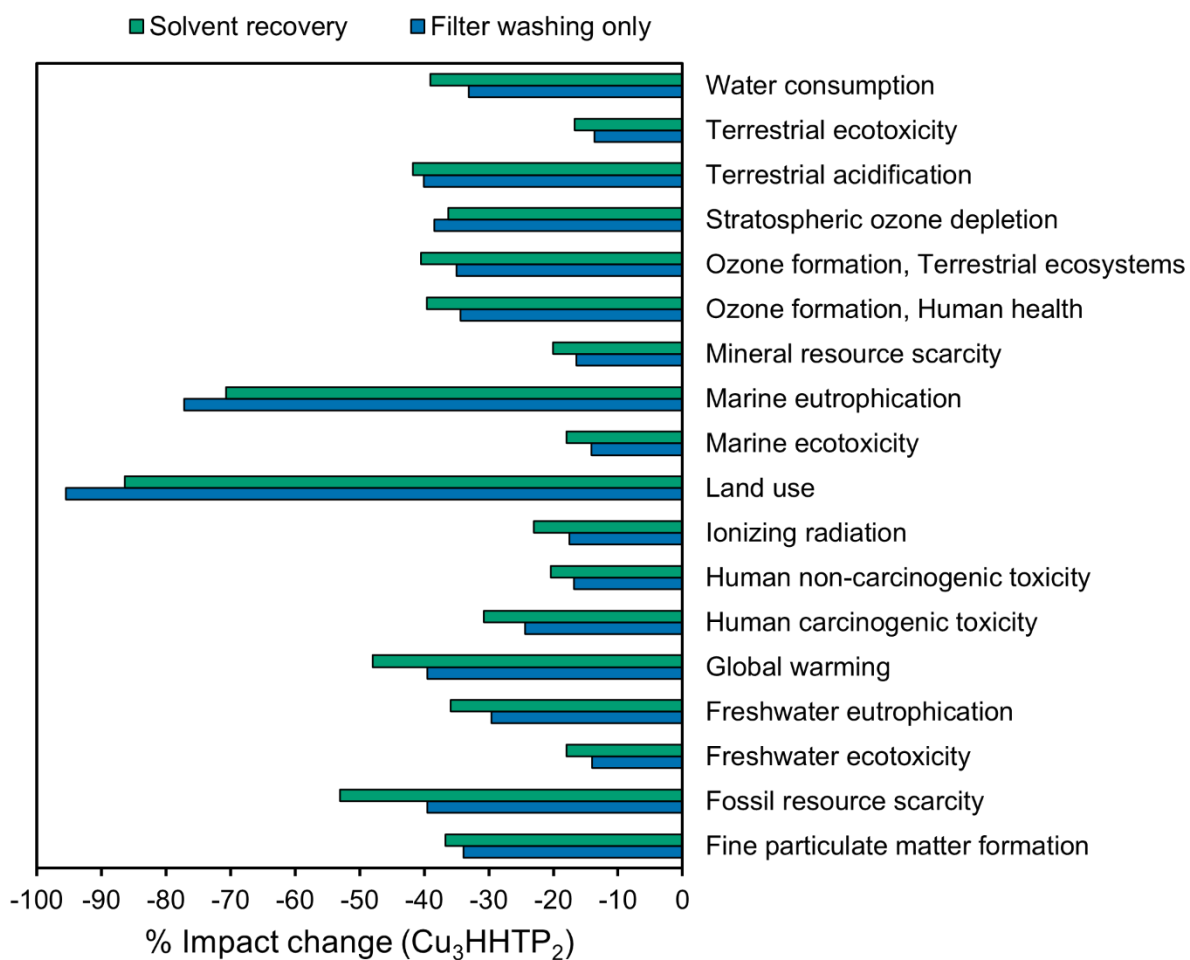

**Figure S4:** Tornado plot showing sensitivity analysis as a % change in midpoint impacts from changing the way ethanol is used in the in-house  $\text{Cu}_3(\text{HHTP})_2$  synthesis, considering (i) eliminating centrifuge washing entirely and only washing on the filter and (ii) solvent recycling of ethanol and acetone (optimistic case, 90% recovery rate).<sup>13</sup>

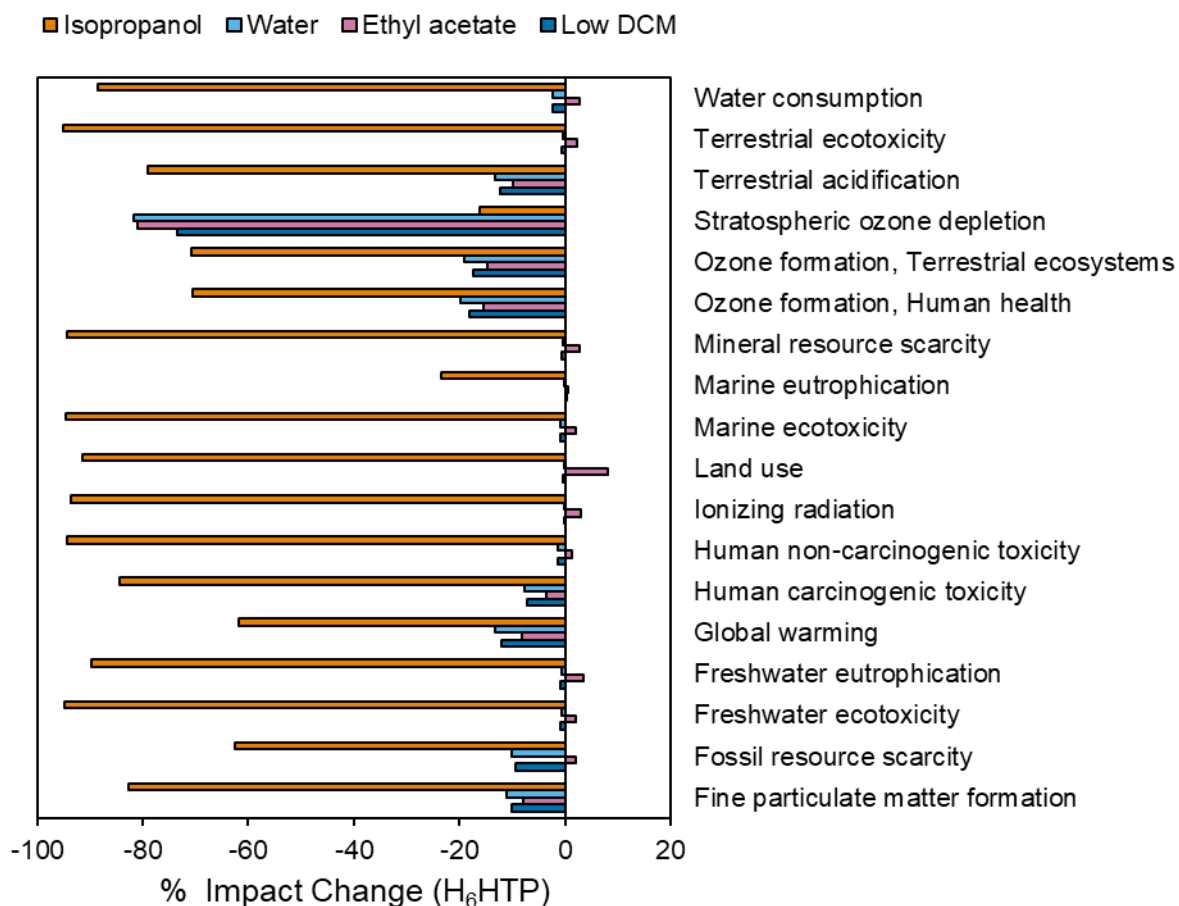

**Figure S5:** Tornado plot showing sensitivity analysis as a % change in midpoint impacts for the HHTP linker starting material, H<sub>6</sub>HHTP, considering employing alternative solvents in its synthesis, water or ethyl acetate in place of dichloromethane (DCM), and isopropanol in place of hexafluoroisopropanol, or a 90% reduction in the quantity of dichloromethane.

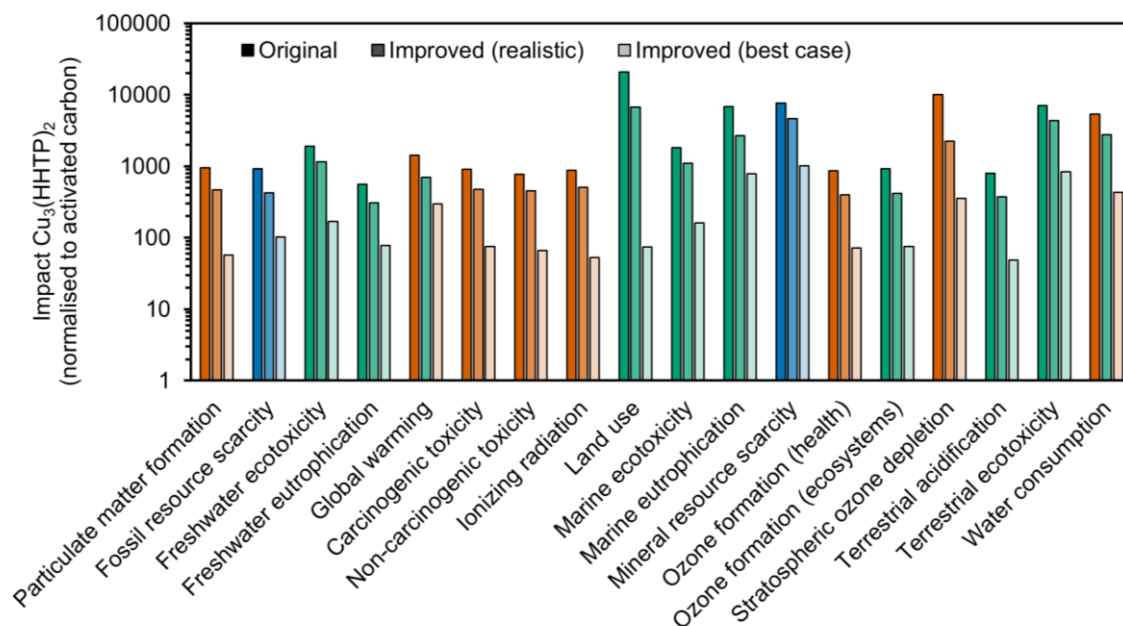

**Figure S6:** Life cycle assessment impacts of  $\text{Cu}_3(\text{HHTP})_2$  determined by ReCiPe Midpoint (H) LCA normalised relative to benchmark carbon system. A logarithmic scale is used to represent the scale of the impact, which is between 1000 times and 100,000 times that of carbon. The first bar is the original synthesis, with the results consistent with Figure S2. The second and third bars represent hypothetical moderately improved (realistic) and optimistic (best case) scenarios combining reduced washing, solvent recovery, higher yields and greener solvent used for the linker synthesis. Blue is indicative of finite resource depletion impacts, green of environmental degradation impacts and orange human health deterioration impacts, where global warming and water consumption contribute to two endpoint categories.

## References

- (1) Harris, P. J. F. Fullerene-like Models for Microporous Carbon. *J. Mater. Sci.* **2013**, *48* (2), 565–577. <https://doi.org/10.1007/s10853-012-6788-1>.
- (2) Sheberla, D.; Bachman, J. C.; Elias, J. S.; Sun, C.-J.; Shao-Horn, Y.; Dincă, M. Conductive MOF Electrodes for Stable Supercapacitors with High Areal Capacitance. *Nat. Mater.* **2017**, *16* (2), 220–224. <https://doi.org/10.1038/nmat4766>.
- (3) Gittins, J. W.; Balhatchet, C. J.; Chen, Y.; Liu, C.; Madden, D. G.; Britto, S.; Golomb, M. J.; Walsh, A.; Fairen-Jimenez, D.; Dutton, S. E.; Forse, A. C. Insights into the Electric Double-Layer Capacitance of Two-Dimensional Electrically Conductive Metal–Organic Frameworks. *J. Mater. Chem. A* **2021**, *9* (29), 16006–16015. <https://doi.org/10.1039/D1TA04026J>.
- (4) Huijbregts, M. A. J.; Steinmann, Z. J. N.; Elshout, P. M. F.; Stam, G.; Verones, F.; Vieira, M.; Zijp, M.; Hollander, A.; Van Zelm, R. ReCiPe2016: A Harmonised Life Cycle Impact Assessment Method at Midpoint and Endpoint Level. *Int. J. Life Cycle Assess.* **2017**, *22* (2), 138–147. <https://doi.org/10.1007/s11367-016-1246-y>.
- (5) Huijbregts, M. A. J.; Steinmann, Z. J. N.; Elshout, P. M. F.; Stam, G.; Verones, F.; Vieria, M. D. M.; Hollander, A.; Zijp, M.; Zelm, R. van. *ReCiPe 2016 A Harmonized Life Cycle Impact Assessment Method at Midpoint and Endpoint Level*; RIVM; I; National Institute for Public Health and the Environment: P.O. Box 1, 3720 BA, Bilthoven, The Netherlands, 2016. <https://www.rivm.nl/bibliotheek/rapporten/2016-0104.pdf> (accessed 2025-03-04).
- (6) Reynolds, M.; Checkel, M. D.; Fraser, R. A. Application of Monte Carlo Analysis to Life Cycle Assessment. *J. Mater. Manuf.* **1999**, *108*, 1–9.
- (7) Glogic, E.; Kamali, A. K.; Keppetipola, N. M.; Alonge, B.; Kumara, G. R. A.; Sonnemann, G.; Toupance, T.; Cojocar, L. Life Cycle Assessment of Supercapacitor Electrodes Based on Activated Carbon from Coconut Shells. *ACS Sustain. Chem. Eng.* **2022**, *10* (46), 15025–15034. <https://doi.org/10.1021/acssuschemeng.2c03239>.
- (8) Gittins, J. W.; Ge, K.; Balhatchet, C. J.; Taberna, P.-L.; Simon, P.; Forse, A. C. Understanding Electrolyte Ion Size Effects on the Performance of Conducting Metal–Organic Framework Supercapacitors. *J. Am. Chem. Soc.* **2024**, *146* (18), 12473–12484. <https://doi.org/10.1021/jacs.4c00508>.
- (9) Morimoto, K.; Dohi, T.; Kita, Y. Oxidative Trimerization of Catechol to Hexahydroxytriphenylene. *Eur. J. Org. Chem.* **2013**, *2013* (9), 1659–1662. <https://doi.org/10.1002/ejoc.201201515>.
- (10) Gittins, J. W.; Balhatchet, C. J.; Chen, Y.; Liu, C.; Madden, D. G.; Britto, S.; Golomb, M. J.; Walsh, A.; Fairen-Jimenez, D.; Dutton, S. E.; Forse, A. C. Insights into the Electric Double-Layer Capacitance of Two-Dimensional Electrically Conductive Metal–Organic Frameworks. *J. Mater. Chem. A* **2021**, *9* (29), 16006–16015. <https://doi.org/10.1039/D1TA04026J>.
- (11) Cossutta, M.; Vretenar, V.; Centeno, T. A.; Kotrusz, P.; McKechnie, J.; Pickering, S. J. A Comparative Life Cycle Assessment of Graphene and Activated Carbon in a Supercapacitor Application. *J. Clean. Prod.* **2020**, *242*, 118468. <https://doi.org/10.1016/j.jclepro.2019.118468>.
- (12) Morimoto, K.; Dohi, T.; Kita, Y. Oxidative Trimerization of Catechol to Hexahydroxytriphenylene. *Eur. J. Org. Chem.* **2013**, *2013* (9), 1659–1662. <https://doi.org/10.1002/ejoc.201201515>.
- (13) Aboagye, E. A.; Chea, J. D.; Yenkie, K. M. Systems Level Roadmap for Solvent Recovery and Reuse in Industries. *iScience* **2021**, *24* (10), 103114. <https://doi.org/10.1016/j.isci.2021.103114>.
